# Supplementary material
Source: ML conference proceedings conference paper supplement (https://openaccess.thecvf.com/content/CVPR2024/html/Paplham_A_Call_to_CVPR_2024_paper.html)
Supplement: Supplementary file 2 [file Paplham_A_Call_to_CVPR_2024_supplemental.zip]

Archive with 3 entries (3 files):
- 4083_supp.pdf
- Facial-Age-Estimation-Benchmark-Databases.zip
- Facial-Age-Estimation-Benchmark-main.zip
